# Supplementary material for: Investigation of gene–diet interactions in the incretin system and risk of type 2 diabetes: the EPIC-InterAct study
Source: Springer Nature journal article supplement (doi:10.1007/s00125-016-4090-5), 2016-09-13
Supplement: MOESM2 [file 10696080]

**ESM Table 1: Characteristics of the incretin-related SNPs used for the current analysis in the EPIC-InterAct study**

| SNP        | Gene          | Chromosome | Alleles (major/minor) | MAF <sup>a</sup> | Risk allele | Risk allele possible effect                                              |
|------------|---------------|------------|-----------------------|------------------|-------------|--------------------------------------------------------------------------|
| rs12255372 | <i>TCF7L2</i> | 10         | G/T                   | 0.30             | T           | decreased pancreatic GLP-1 sensitivity and lower GIP secretion [4-8, 14] |
| rs7903146  | <i>TCF7L2</i> | 10         | C/T                   | 0.30             | T           |                                                                          |
| rs163171   | <i>KCNQ1</i>  | 11         | C/T                   | 0.22             | T           | decreased GLP-1 and GIP secretion from the gut [10-12]                   |
| rs163184   | <i>KCNQ1</i>  | 11         | T/G                   | 0.48             | G           |                                                                          |
| rs2237892  | <i>KCNQ1</i>  | 11         | C/T                   | 0.06             | C           |                                                                          |
| rs10423928 | <i>GIPR</i>   | 19         | T/A                   | 0.20             | A           | decreased pancreatic GIP sensitivity [2]                                 |
| rs10010131 | <i>WFS1</i>   | 4          | G/A                   | 0.40             | G           | decreased pancreatic GLP-1 sensitivity [9]                               |

<sup>a</sup>Minor allele frequency

**ESM Table 2: Baseline characteristics of the EPIC-InterAct subcohort participants with data available for at least one SNP of interest stratified by country**

| Characteristic                         | France (N=311)   |            |                            | Italy (N=1539)   |            |                            | Spain (N=2657)   |            |                            | UK (N=933)       |            |                            |
|----------------------------------------|------------------|------------|----------------------------|------------------|------------|----------------------------|------------------|------------|----------------------------|------------------|------------|----------------------------|
|                                        | Missing Data (%) | Median / % | 25th - 75th Percentile / N | Missing Data (%) | Median / % | 25th - 75th Percentile / N | Missing Data (%) | Median / % | 25th - 75th Percentile / N | Missing Data (%) | Median / % | 25th - 75th Percentile / N |
| Age (years)                            | 0                | 55.2       | (50.8 - 61.1)              | 0                | 50.1       | (44.0 - 56.5)              | 0                | 48.2       | (42.6 - 54.9)              | 0                | 56.8       | (48.8 - 65.4)              |
| Sex (female)                           | 0                | 100.0      | 311                        | 0                | 65.4       | 1007                       | 0                | 62.6       | 1663                       | 0                | 61.0       | 569                        |
| BMI (kg/m <sup>2</sup> )               | 0.3              | 22.4       | (20.7 - 24.4)              | 0                | 25.2       | (22.8 - 27.9)              | 0                | 27.8       | (25.3 - 30.5)              | 0                | 24.9       | (22.8 - 27.4)              |
| Waist (cm)                             | 0                | 74.0       | (70.0 - 80.0)              | 1.9              | 83.0       | (74.0 - 91.0)              | 0.1              | 92.5       | (83.0 - 100.0)             | 0.8              | 83.0       | (73.6 - 91.0)              |
| Highest School Level                   | 0                |            |                            | 0                |            |                            | 0                |            |                            | 0                |            |                            |
| None                                   |                  | 0.6        | 2                          |                  | 1.0        | 16                         |                  | 33.9       | 901                        |                  | 0.0        | 0                          |
| Primary                                |                  | 11.6       | 36                         |                  | 47.1       | 725                        |                  | 39.1       | 1040                       |                  | 31.7       | 296                        |
| Technical                              |                  | 0          |                            |                  | 12.5       | 192                        |                  | 7.6        | 202                        |                  | 35.2       | 328                        |
| Secondary                              |                  | 51.8       | 161                        |                  | 25.0       | 385                        |                  | 6.9        | 183                        |                  | 10.9       | 102                        |
| Further education                      |                  | 36.0       | 112                        |                  | 14.4       | 221                        |                  | 12.5       | 331                        |                  | 22.2       | 207                        |
| Smoking status                         | 0                |            |                            | 0                |            |                            | 0                |            |                            | 0                |            |                            |
| Never                                  |                  | 70.4       | 219                        |                  | 44.7       | 688                        |                  | 54.5       | 1447                       |                  | 51.0       | 476                        |
| Former                                 |                  | 20.9       | 65                         |                  | 27.6       | 424                        |                  | 17.0       | 451                        |                  | 34.4       | 321                        |
| Current                                |                  | 8.7        | 27                         |                  | 27.8       | 427                        |                  | 28.6       | 759                        |                  | 14.6       | 136                        |
| Cambridge Index of Physical Activity   | 0                |            |                            | 0                |            |                            | 0                |            |                            | 0                |            |                            |
| Inactive                               |                  | 18.3       | 57                         |                  | 26.3       | 404                        |                  | 37.1       | 986                        |                  | 31.9       | 298                        |
| Moderately inactive                    |                  | 34.4       | 107                        |                  | 39.9       | 614                        |                  | 34.3       | 912                        |                  | 31.5       | 294                        |
| Moderately active                      |                  | 37.9       | 118                        |                  | 17.9       | 275                        |                  | 17.1       | 453                        |                  | 21.7       | 202                        |
| Active                                 |                  | 9.3        | 29                         |                  | 16.0       | 246                        |                  | 11.5       | 306                        |                  | 14.9       | 139                        |
| Energy (MJ/day)                        | 0                | 8.9        | (7.5 - 10.7)               | 0                | 9.4        | (7.5 - 11.4)               | 0                | 8.7        | (7.0 - 10.8)               | 0                | 8.2        | (6.6 - 10.0)               |
| Cereal fibre (g/day)                   | 0.3              | 5.7        | (3.9 - 7.7)                | 0                | 7.1        | (5.1 - 9.8)                | 0                | 5.6        | (3.7 - 7.8)                | 0                | 6.5        | (4.3 - 9.9)                |
| Fruit and vegetables (g/day)           | 0                | 417        | (293 - 567)                | 0                | 424        | (306 - 565)                | 0                | 466        | (310 - 651)                | 0                | 305        | (211 - 435)                |
| Whey-containing dairy products (g/day) | 0                | 205        | (121 - 323)                | 0                | 141        | (27 - 232)                 | 0                | 238        | (150 - 357)                | 0                | 373        | (293 - 518)                |
| Meat (g/day)                           | 0                | 77.6       | (47.8 - 112.4)             | 0                | 67.3       | (44.3 - 96.7)              | 0                | 71.0       | (43.3 - 107.5)             | 0                | 55.1       | (32.1 - 87.5)              |
| Olive oil (g/day)                      | 0                | 0.0        | (0.0 - 2.4)                | 0                | 23.2       | (16.9 - 32.0)              | 0                | 19.7       | (10.3 - 29.9)              | 100              |            |                            |
| Coffee (g/day)                         | 0                | 250        | (70 - 415)                 | 0                | 90         | (60 - 130)                 | 0                | 89         | (11 - 173)                 | 0                | 475        | (83 - 488)                 |
| Soft drinks (g/day)                    | 0                | 0.0        | (0.0 - 0.0)                | 0                | 0.0        | (0.0 - 28.6)               | 0                | 0.0        | (0.0 - 0.0)                | 0                | 33.1       | (0.0 - 158.0)              |
| alcohol intake (g/day)                 | 0                |            |                            | 0                |            |                            | 0                |            |                            | 0                |            |                            |
| 0                                      |                  | 16.4       | 51                         |                  | 15.5       | 239                        |                  | 33.6       | 893                        |                  | 14.5       | 135                        |
| >0-6                                   |                  | 36.7       | 114                        |                  | 32.8       | 504                        |                  | 24.1       | 639                        |                  | 42.7       | 398                        |
| >6-12                                  |                  | 14.8       | 46                         |                  | 10.7       | 164                        |                  | 9.6        | 256                        |                  | 20.5       | 191                        |
| >12-24                                 |                  | 20.6       | 64                         |                  | 16.1       | 248                        |                  | 12.2       | 325                        |                  | 14.3       | 133                        |
| >24                                    |                  | 11.6       | 36                         |                  | 25.0       | 384                        |                  | 20.5       | 544                        |                  | 8.2        | 76                         |
| Hypertension                           | 0.3              | 13.5       | 42                         | 0.2              | 19.2       | 296                        | <0.1             | 17.80      | 474                        | 0.3              | 12.8       | 119                        |
| Hyperlipidaemia                        | 1.3              | 11.3       | 35                         | 0.2              | 23.9       | 368                        | 0.7              | 18.7       | 498                        | 0.8              | 8.0        | 75                         |
| Stroke                                 | 1.9              | 0.3        | 1                          | 0.3              | 0.2        | 3                          | 0.2              | 0.4        | 11                         | 0.4              | 0.8        | 7                          |
| Myocardial infarction                  | 0                | 0.3        | 1                          | 0                | 0.5        | 7                          | <0.1             | 0.4        | 11                         | 0.9              | 2.6        | 24                         |

**ESM Table 2 (continued): Baseline characteristics of the EPIC-InterAct subcohort participants with data available for at least one SNP of interest stratified by country**

| Characteristic                         | Netherlands (N=1171) |            |                            | Germany (N=1819) |            |                            | Sweden (N=2605)  |            |                            |
|----------------------------------------|----------------------|------------|----------------------------|------------------|------------|----------------------------|------------------|------------|----------------------------|
|                                        | Missing Data (%)     | Median / % | 25th - 75th Percentile / N | Missing Data (%) | Median / % | 25th - 75th Percentile / N | Missing Data (%) | Median / % | 25th - 75th Percentile / N |
| Age (years)                            | 0                    | 53.4       | (49.5 – 60.0)              | 0                | 50.4       | (43.0 - 57.6)              | 0                | 53.6       | (48.5 - 60.7)              |
| Sex (female)                           | 0                    | 82.8       | 970                        | 0                | 58.7       | 1068                       | 0                | 56.7       | 1477                       |
| BMI (kg/m <sup>2</sup> )               | 0                    | 24.7       | (22.7 - 27.4)              | 0                | 25.2       | (22.9 - 27.9)              | 0                | 24.6       | (22.4 - 27.2)              |
| Waist (cm)                             | 0                    | 82.0       | (75.0 - 89.0)              | 0                | 85.0       | (75.6 - 94.0)              | 36.2             | 83.0       | (74.0 - 93.0)              |
| Highest School Level                   | 0                    |            |                            | 0                |            |                            | 0                |            |                            |
| None                                   |                      | 0.0        | 0                          |                  | 0.7        | 13                         |                  | 0.4        | 11                         |
| Primary                                |                      | 18.1       | 212                        |                  | 19.9       | 362                        |                  | 36.2       | 942                        |
| Technical                              |                      | 30.0       | 351                        |                  | 37.9       | 690                        |                  | 25.1       | 655                        |
| Secondary                              |                      | 29.7       | 348                        |                  | 6.5        | 118                        |                  | 17.2       | 448                        |
| Further education                      |                      | 22.2       | 260                        |                  | 35.0       | 636                        |                  | 21.1       | 549                        |
| Smoking status                         | 0                    |            |                            | 0                |            |                            | 0                |            |                            |
| Never                                  |                      | 40.1       | 469                        |                  | 47.2       | 858                        |                  | 46.0       | 1199                       |
| Former                                 |                      | 32.5       | 380                        |                  | 32.4       | 589                        |                  | 27.3       | 711                        |
| Current                                |                      | 27.5       | 322                        |                  | 20.5       | 372                        |                  | 26.7       | 695                        |
| Cambridge Index of Physical Activity   | 0                    |            |                            | 0                |            |                            | 0                |            |                            |
| Inactive                               |                      | 7.4        | 87                         |                  | 15.8       | 288                        |                  | 24.3       | 634                        |
| Moderately inactive                    |                      | 27.6       | 323                        |                  | 37.5       | 682                        |                  | 33.3       | 868                        |
| Moderately active                      |                      | 24.9       | 292                        |                  | 26.9       | 490                        |                  | 25.7       | 670                        |
| Active                                 |                      | 40.1       | 469                        |                  | 19.7       | 359                        |                  | 16.6       | 433                        |
| Energy (MJ/day)                        | 0                    | 7.9        | (6.6 – 9.4)                | 0                | 8.1        | (6.7 – 10.1)               | 0                | 8.5        | (6.9 – 10.4)               |
| Cereal fibre (g/day)                   | 0                    | 7.2        | (5.4 - 9.6)                | 0                | 9.1        | (6.4 - 12.4)               | 0                | 8.4        | (5.9 - 11.9)               |
| Fruit and vegetables (g/day)           | 0                    | 278        | (188 - 388)                | 0                | 191        | (144 - 273)                | 0                | 240        | (146 - 360)                |
| Whey-containing dairy products (g/day) | 0                    | 365        | (213 - 541)                | 0                | 164        | (84 - 281)                 | 0                | 330        | (197 - 512)                |
| Meat (g/day)                           | 0                    | 79.3       | (49.5 – 111.8)             | 0                | 82.0       | (52.1 – 119.9)             | 0                | 64.0       | (41.8 – 93.8)              |
| Olive oil (g/day)                      | 0                    | 0.0        | (0.0 - 0.0)                | 0                | 0.6        | (0.0 - 2.0)                | 36.2             | 0.0        | (0.0 - 0.0)                |
| Coffee (g/day)                         | 0                    | 500        | (375 - 750)                | 0                | 392        | (261 - 580)                | 0                | 400        | (300 - 601)                |
| Soft drinks (g/day)                    | 0                    | 55.7       | (9.2 - 138.5)              | 0                | 2.0        | (0.0 - 29.3)               | 0                | 39.4       | (0.0 - 126.9)              |
| alcohol intake (g/day)                 | 0                    |            |                            | 0                |            |                            | 0                |            |                            |
| 0                                      |                      | 15.9       | 186                        |                  | 4.00       | 72                         |                  | 13.5       | 352                        |
| >0-6                                   |                      | 38.5       | 451                        |                  | 36.4       | 662                        |                  | 46.4       | 1208                       |
| >6-12                                  |                      | 14.5       | 170                        |                  | 18.0       | 328                        |                  | 19.0       | 494                        |
| >12-24                                 |                      | 16.7       | 196                        |                  | 19.6       | 357                        |                  | 14.8       | 386                        |
| >24                                    |                      | 14.4       | 168                        |                  | 22.0       | 400                        |                  | 6.3        | 165                        |
| Hypertension                           | 4.1                  | 18.3       | 214                        | 0.2              | 31.0       | 563                        | 0.2              | 15.7       | 408                        |
| Hyperlipidaemia                        | 8.3                  | 8.5        | 99                         | 0.5              | 29.2       | 531                        | 99.6             | 0.4        | 11                         |
| Stroke                                 | 0.5                  | 0.9        | 11                         | 0                | 1.0        | 19                         | 43.2             | 1.0        | 26                         |
| Myocardial infarction                  | 0.0                  | 1.6        | 19                         | 0                | 1.5        | 27                         | 7.4              | 1.7        | 45                         |

ESM Table 3: Hazard Ratios (95% CI) for incident type 2 diabetes by genotype of each SNP, as well as the genetic risk score, in the EPIC-InterAct study

| SNP                                     | HR (95% CI)                                                          |                                                           | minor allele homozygous<br>(n <sub>cases</sub> /n <sub>total</sub> ) | p-value<br>(additive model) |                   |                   |                       |
|-----------------------------------------|----------------------------------------------------------------------|-----------------------------------------------------------|----------------------------------------------------------------------|-----------------------------|-------------------|-------------------|-----------------------|
|                                         | major allele homozygous<br>(n <sub>cases</sub> /n <sub>total</sub> ) | heterozygous<br>(n <sub>cases</sub> /n <sub>total</sub> ) |                                                                      |                             |                   |                   |                       |
| <i>TCF7L2</i> rs1225372                 | GG (3,216/8,171)                                                     | GT (3,520/7,661)                                          | TT (906/1,807)                                                       | 1.4*10 <sup>-8</sup>        |                   |                   |                       |
|                                         | 1.00                                                                 | 1.40 (1.23; 1.61)                                         | 1.61 (1.37; 1.88)                                                    |                             |                   |                   |                       |
| <i>TCF7L2</i> rs7903146                 | CC (3,197/8,196)                                                     | CT (3,622/7,896)                                          | TT (977/1,879)                                                       | 2.9*10 <sup>-11</sup>       |                   |                   |                       |
|                                         | 1.00                                                                 | 1.39 (1.21; 1.60)                                         | 1.74 (1.51; 1.99)                                                    |                             |                   |                   |                       |
| <i>KCNQ1</i> rs163171                   | CC (4,647/10,652)                                                    | CT (2,605/6,110)                                          | TT (391/883)                                                         | 0.74                        |                   |                   |                       |
|                                         | 1.00                                                                 | 0.96 (0.87; 1.06)                                         | 1.04 (0.88; 1.23)                                                    |                             |                   |                   |                       |
| <i>KCNQ1</i> rs163184                   | TT (2,007/4,850)                                                     | TG (3,971/9,135)                                          | GG (1,977/4,367)                                                     | 6.2*10 <sup>-5</sup>        |                   |                   |                       |
|                                         | 1.00                                                                 | 1.11 (1.03; 1.19)                                         | 1.19 (1.09; 1.30)                                                    |                             |                   |                   |                       |
| <i>KCNQ1</i> rs2237892                  | CC (6,148/13869)                                                     | CT (701/1,647)                                            | TT (20/61)                                                           | 0.008                       |                   |                   |                       |
|                                         | 1.00                                                                 | 0.90 (0.81; 1.00)                                         | 0.58 (0.30; 1.12)                                                    |                             |                   |                   |                       |
| <i>GIPR</i> rs10423928                  | TT (4,925/11,548)                                                    | TA (2,684/6,014)                                          | AA (345/784)                                                         | 0.01                        |                   |                   |                       |
|                                         | 1.00                                                                 | 1.10 (1.03; 1.17)                                         | 1.07 (0.92; 1.24)                                                    |                             |                   |                   |                       |
| <i>WFS1</i> rs10010131                  | GG (2,857/6,392)                                                     | GA (3,424/8,095)                                          | AA (1,185/2,773)                                                     | 0.02                        |                   |                   |                       |
|                                         | 1.00                                                                 | 0.90 (0.83; 0.97)                                         | 0.89 (0.78; 1.01)                                                    |                             |                   |                   |                       |
| N (risk alleles)                        | 0-3                                                                  | 4                                                         | 5                                                                    | 6                           | 7-10              | continuous model  | p for trend           |
| n <sub>cases</sub> / n <sub>total</sub> | 642/1,710                                                            | 1,188/2,890                                               | 1,684/3,780                                                          | 1,509/3,331                 | 1,147/2,326       | 6,170/14,037      |                       |
| Genetic risk score <sup>a</sup>         | 1.00                                                                 | 1.17 (0.97; 1.42)                                         | 1.42 (1.25;1.60)                                                     | 1.49 (1.29; 1.73)           | 1.72 (1.50; 1.96) | 1.17 (1.14; 1.22) | 2.4*10 <sup>-20</sup> |

Cox-regression stratified by centre and age (years) and adjusted for sex. Country-specific estimates were combined by random-effects meta-analysis.

<sup>a</sup> The genetic risk score was constructed using the type 2 diabetes risk allele for *TCF7L2* rs7903146, *KCNQ1* rs163184, *KCNQ1* rs2237892, *GIPR* rs10423928, *WFS1* rs10010131. For the continuous analysis the risk score was z-transformed (mean = 0, sd = 1).

**ESM Table 4: Multivariable-adjusted Hazard Ratios (95% CI) for the dietary main effect on incident type 2 diabetes in the EPIC-InterAct study**

| <b>Dietary factor</b>                            | <b>HR (95% CI)</b>  |
|--------------------------------------------------|---------------------|
| $n_{\text{cases}} / n_{\text{total}}$            | <b>8,086/18,638</b> |
| whey-containing dairy (per 150g/d)               | 1.02 (0.98; 1.06)   |
| cereal fibre (per 10 g/d)                        | 1.06 (0.93; 1.20)   |
| Coffee (per 125 g/day)                           | 0.98 (0.96; 0.99)   |
| $n_{\text{cases}} / n_{\text{total}}^{\text{a}}$ | <b>6,616/15,351</b> |
| olive oil <sup>a</sup> (per 10 g/d)              | 0.97 (0.90; 1.03)   |

Analysis stratified by centre and age (years) and adjusted for sex, centre, educational attainment, physical activity, smoking status, BMI, alcohol consumption, soft drink consumption, fruit and vegetable intake, meat intake, total energy intake and mutual adjustment of the four dietary factors of interest (whey-containing-dairy, cereal fibre, olive oil and coffee)

<sup>a</sup> Participants in the UK centres ( $n_{\text{cases}} = 685 / n_{\text{total}} = 1,594$ ) and the Swedish centre Umeå ( $n_{\text{cases}} = 785 / n_{\text{total}} = 1,693$ ) were excluded from specific analysis due to inaccurate assessment of olive oil consumption.
